# Supplementary material
Source: Springer Nature journal article supplement (http://www.springermedizin.de/resource/supplementary/12891_2013_1838_MOESM4_ESM.pdf/9508590)

**VEGF****DAPI****VEGF/DAPI****LV-GFP**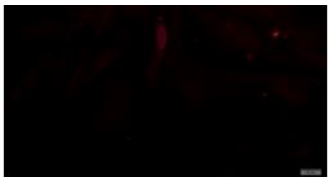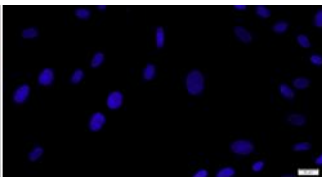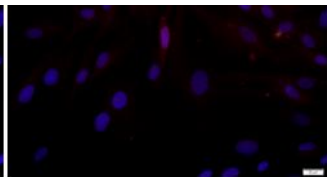**LV-Foxc2**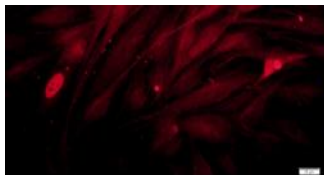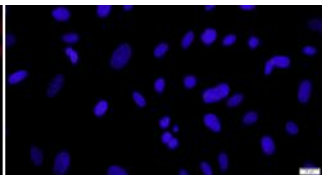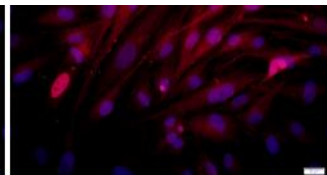**PDGF- $\beta$** **DAPI****PDGF- $\beta$ /DAPI****LV-GFP**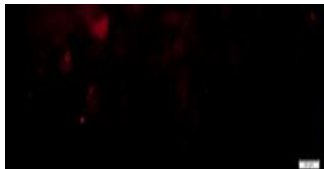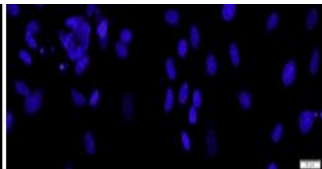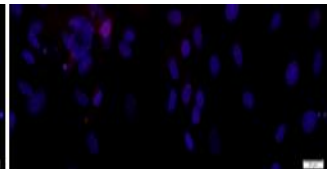**LV-Foxc2**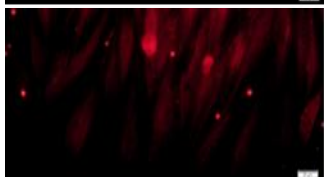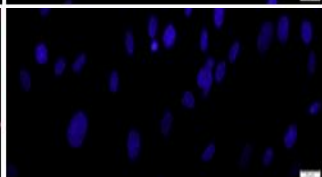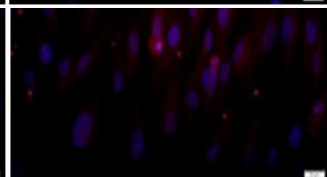

Supplement: MOESM4 [file 9508590]
